# Supplementary material for: First-principles and experimental characterization of the electronic properties of CaGaSiN3 and CaAlSiN3: the impact of chemical disorder
Source: Royal Society of Chemistry journal article supplement (doi:10.1039/c6cp08764g), 2017-01-01
Supplement: c6cp08764g1.pdf [file c6cp08764g1.pdf]

## Electronic Supporting Information for:

### First-principle and experimental characterization of the electronic properties of CaGaSiN<sub>3</sub> and CaAlSiN<sub>3</sub>: The Impact of chemical disorder

Robin Niklaus,<sup>a</sup> Ján Minár,<sup>\*a,b</sup> Jonas Häusler<sup>a</sup> and Wolfgang Schnick<sup>\*a</sup>

<sup>a</sup> Department of Chemistry, University of Munich (LMU), Butenandtstr. 5-13 (D), 81377 Munich, Germany

<sup>b</sup> New Technologies-Research Centre, University of West Bohemia, Univerzitni 8, 306 14 Pilsen, Czech Republic

\*Corresponding authors: Ján Minár and Wolfgang Schnick

#### Supporting calculations on CaGaSiN<sub>3</sub>:

##### Formulas used for the calculation of mechanical properties

Stability criteria for orthorhombic crystals:

$$C_{11}C_{22} > C_{12}^2, C_{22}C_{33} > C_{23}^2, C_{11}C_{33} > C_{13}^2$$

$$C_{ii} > 0 \quad (i=1; 4-6)$$

$$\text{and } C_{11}C_{22}C_{33} + 2C_{12}C_{23}C_{13} - C_{11}C_{23}^2 - C_{22}C_{13}^2 - C_{33}C_{12}^2 > 0$$

Bulk and shear modulus according to Voigt ( $B_V$ ,  $G_V$ ) and Reuss ( $B_R$ ,  $G_R$ ):

$$B_V = \frac{C_{11} + C_{22} + C_{33} + 2(C_{12} + C_{23} + C_{31})}{9}$$

$$B_R = \frac{1}{S_{11} + S_{22} + S_{33} + 2(S_{12} + S_{23} + S_{31})}$$

$$G_V = \frac{(C_{11} + C_{22} + C_{33}) - (C_{12} + C_{23} + C_{31})}{15}$$

$$+ \frac{3(C_{44} + C_{55} + C_{66})}{15}$$

$$G_R = \frac{15}{4(S_{11} + S_{22} + S_{33} - S_{12} - S_{23} - S_{31}) + 3(S_{44} + S_{55} + S_{66})}$$

\* Subscripts  $C_{nm}$  obtained from  $C_{ijkl}$  according to the Voigt notation

$xx \rightarrow 1, yy \rightarrow 2, zz \rightarrow 3, yz \rightarrow 4, zx \rightarrow 5, xy \rightarrow 6$ .

\*\* Compliance constants  $S_{nm}$  are obtained from the inversion of elastic constant matrix  $S=C^{-1}$ .

Voigt-Reuss-Hill approximation:

$$B_{VRH} = \frac{B_V + B_R}{2} \quad G_{VRH} = \frac{G_V + G_R}{2}$$

Young's modulus ( $Y$ ) and the Poisson ratio ( $\nu$ ) are obtained by the relations:

$$Y_{VRH} = \frac{9BG}{3B + G} \quad \nu = \frac{3B - 2G}{6B + 2G}$$

Debye temperature:

$$\theta_D = \frac{\hbar}{k_B} [6\pi^2 V^{1/2} N]^{1/3} \Delta$$

$$\text{with } \Delta = \sqrt{\frac{B}{M}} \left[ 3 \left[ 2 \left( \frac{2}{3} \frac{1+v}{1-2v} \right)^{3/2} + \left( \frac{1}{3} \frac{1+v}{1-v} \right)^{3/2} \right]^{-1} \right]^{1/3}$$

where,  $k_B$  and  $\hbar$  are the Boltzmann and Planck's constant respectively,  $v$  is the Poisson ratio,  $V[\text{m}^3]$  is the volume of the unit cell,  $N$  is the number of atoms in the cell.  $B$  [Pa] represents the bulk modulus and  $M$  [a.u.] the molar mass of the unit cell.

#### Band structure/DOS calculations for the unrelaxed experimental structure models:

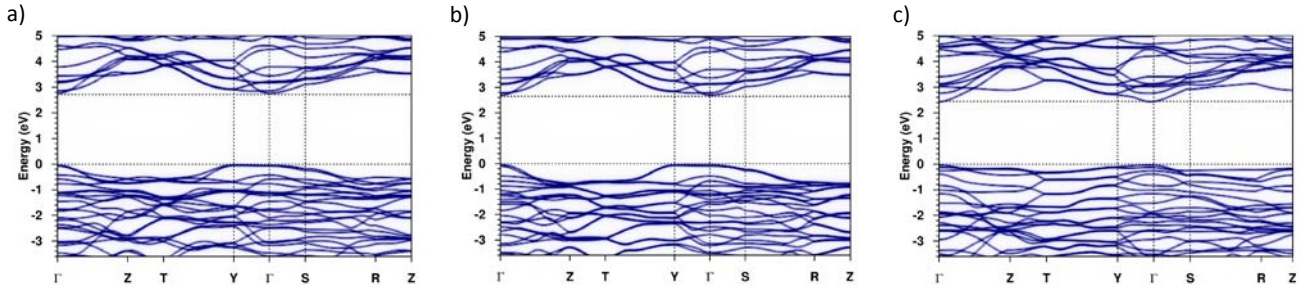

Fig. S 1 Bloch spectral function (a-c) calculated along high symmetry directions in the first Brillouin zone within the MUNICH SPR-KKR program package for the three  $\text{CaGaSiN}_3$  ordering models based on the unrelaxed experimental crystal parameters where (a-c) represent the Si/Ga-ordering variants A, B and C, respectively.

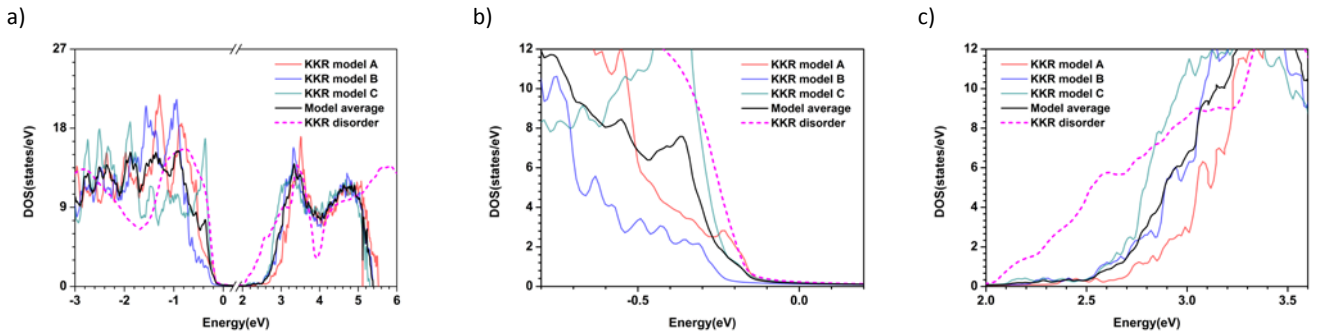

Fig. S 2 Colored: Interpolated total density of states near the valence and conduction band edge for the unrelaxed experimental  $\text{CaGaSiN}_3$  ordering models as calculated from SPRKKR-CPA approach (a-c) including the Ga/Si disorder. Black: Average DOS of the three ordering models.

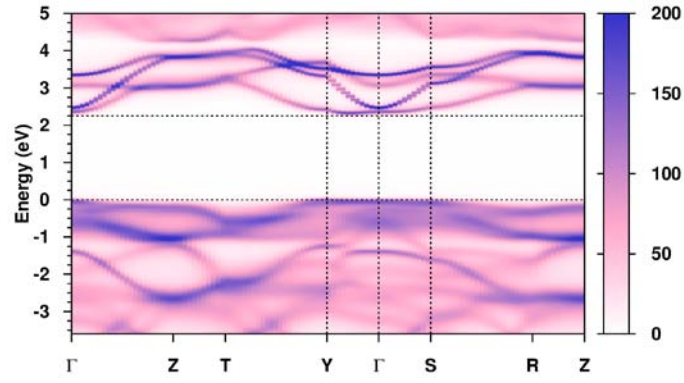

Fig. S 3 Bloch spectral functions along high symmetry directions in the first Brillouin zone for the fully disordered structure of CaGaSiN<sub>3</sub> as based on the experimental crystal structure refinement, calculated within the KKR approach based on the CPA.

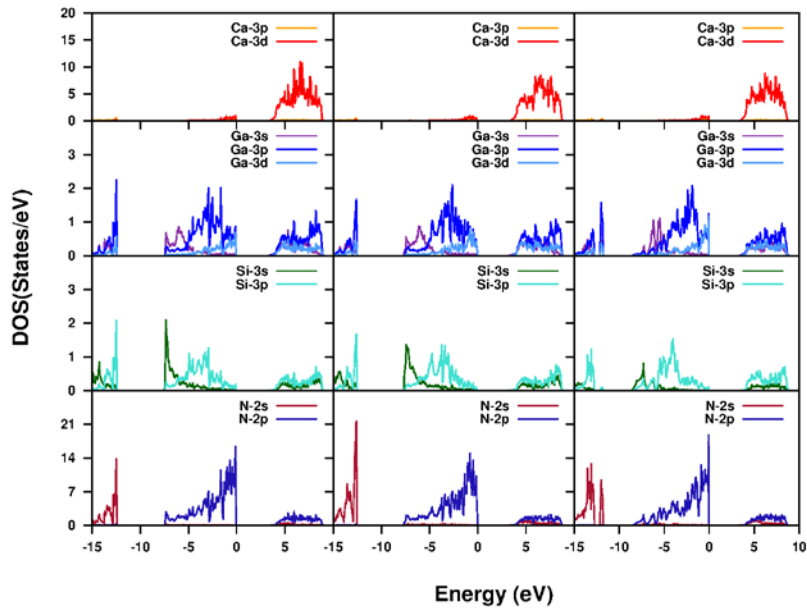

Fig. S 4 Partial density of states of the VASP relaxed ordering models of CaGaSiN<sub>3</sub>. Left to Right: Ordering Models A, B and C.

The respective parts of the dielectric function  $\epsilon$ , extinction coefficient  $k$ , refractive index  $n$ , reflectivity and energy loss spectra from the VASP calculations are depicted in Fig. S 5 (a-d). The static refractive index is found to be 2.29 and the overall refractive index reaches its maximum at 4.6 eV with a value of 3.03.

The energy loss function is defined as

$$\text{Im} \frac{1}{\epsilon} = \frac{\epsilon_1^2}{\epsilon_1^2 + \epsilon_2^2 +}$$

taking large values for  $\epsilon_1 \rightarrow 0$  and  $\epsilon_2 < 1$ .<sup>49</sup> The peaks of the plasma frequency can, therefore, be identified as the maxima of the average energy loss function, with values of 19.5 and 30.25 eV, where  $\epsilon_1$  and  $\epsilon_2$  are sufficiently close to zero.

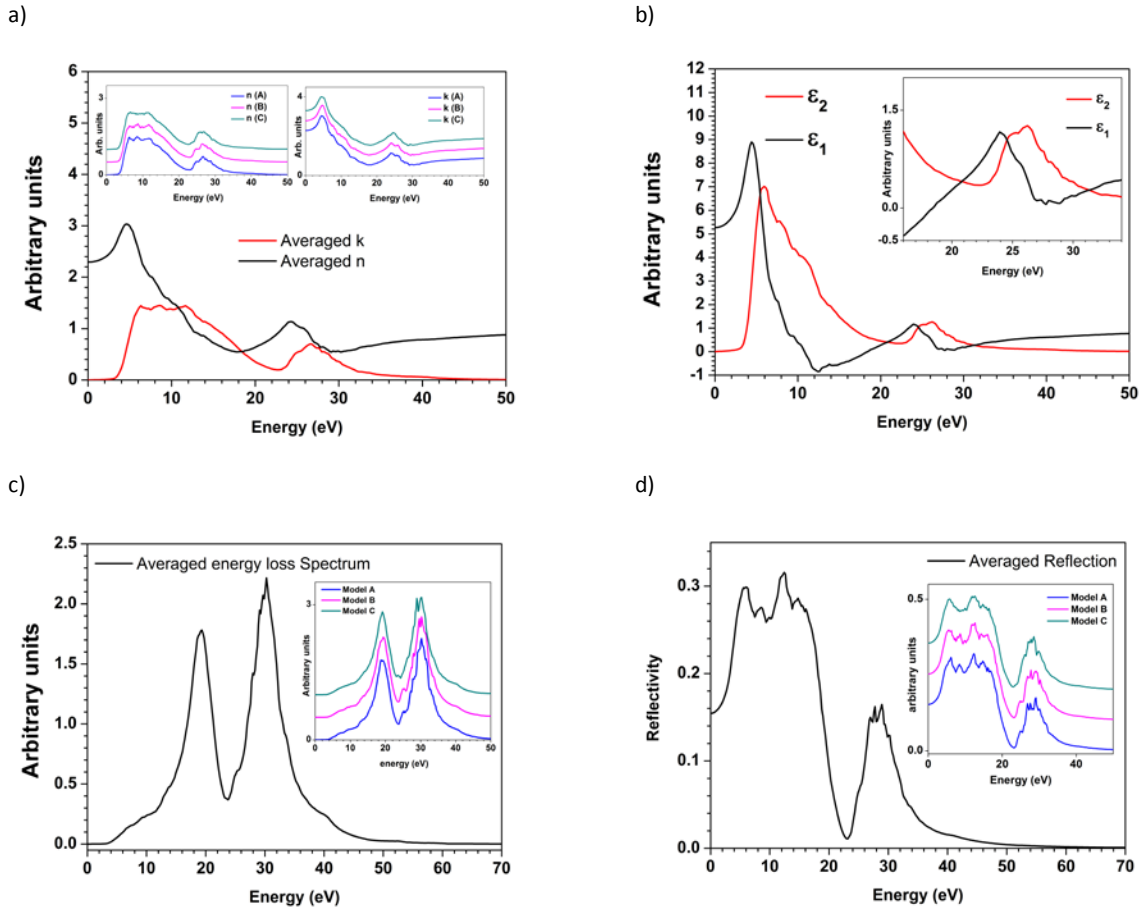

Fig. S 5 a) Calculated extinction coefficient  $k$  and refractive index  $n$ , b) imaginary ( $\epsilon_2$ ) and real ( $\epsilon_1$ ) part of the dielectric function, c) energy loss spectrum and d) reflectivity, for CaGaSiN<sub>3</sub> as an average of the ordering models A, B and C calculated from VASP. The differently colored inset (a,c,d) depicts the different contributions to the shape of the averaged spectrum.

## Supporting calculations on CaAlSiN<sub>3</sub>:

### Total energies (eV/formula unit) for the relaxed ordering structures of CaGaSiN<sub>3</sub> and CaAlSiN<sub>3</sub>

Table S 1 Total energy after structural relaxation for both CaAlSiN<sub>3</sub> and CaGaSiN<sub>3</sub> in eV / formula unit as calculated by VASP

| Ordering variant                                | A       | B       | C       |
|-------------------------------------------------|---------|---------|---------|
| Total energy (eV/f.u. of CaAlSiN <sub>3</sub> ) | -43.982 | -43.980 | -43.803 |
| Total energy (eV/f.u. of CaGaSiN <sub>3</sub> ) | -41.132 | -41.140 | -40.885 |

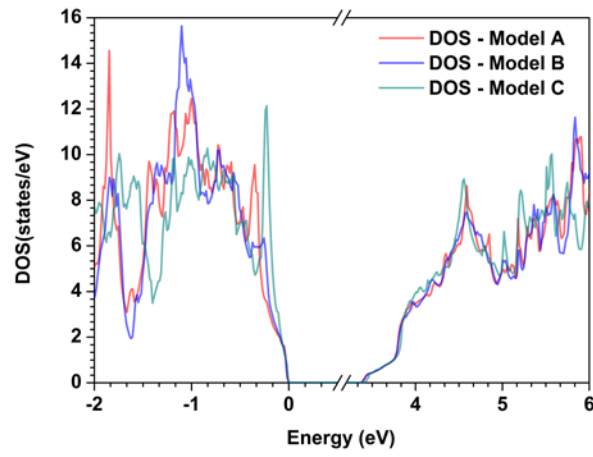

Fig. S 6 Density of states of  $\text{CaAlSiN}_3$  for the relaxed  $\text{CaGaSiN}_3$  analogue (Al/Si) ordering variants A, B and C as calculated by Vasp.

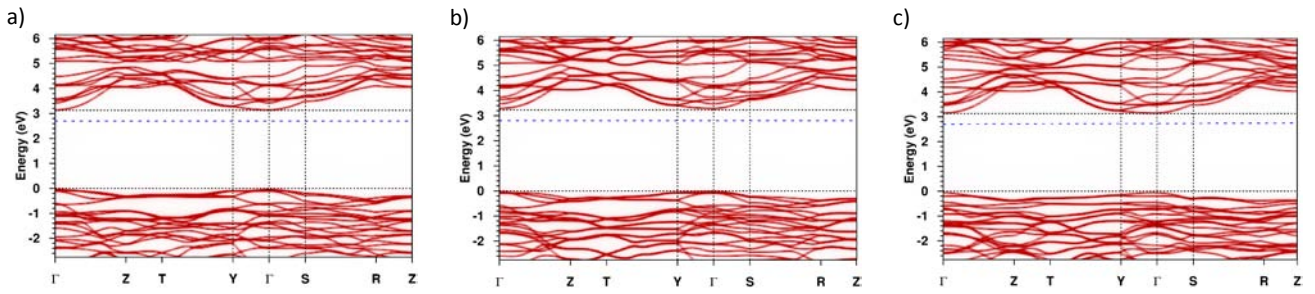

Fig. S 7 Bloch spectral function (a-c) calculated along high symmetry directions in the first Brillouin zone within the MUNICH SPR-KKR program package for the three relaxed  $\text{CaAlSiN}_3$  ordering models, where (a-c) represent the Si/Al-ordering variants A, B and C, respectively. Blue lines indicate the relative conduction band minimum for the calculations of the respective  $\text{CaGaSiN}_3$  models.

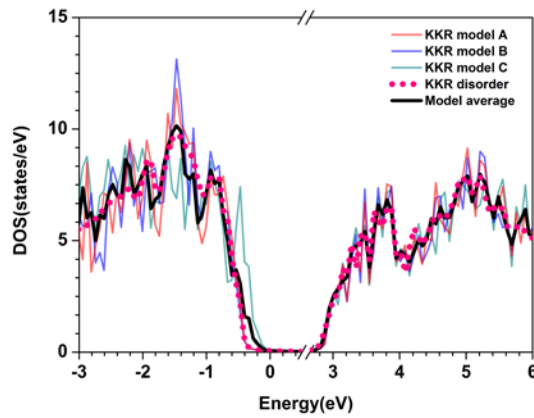

Fig. S 8 Unrelaxed calculated density of states of  $\text{CaAlSiN}_3$  for the  $\text{CaGaSiN}_3$  analogue (Al/Si) ordering variants A, B and C calculated with KKR. Black: Average density of states of the combined models.

a)

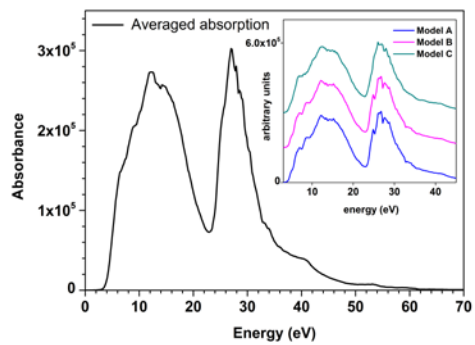

b)

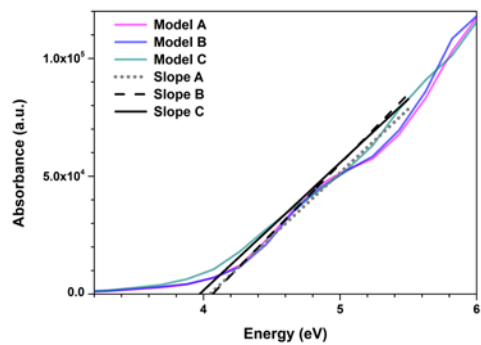

Fig. S 9 Calculated absorption (a) and intersecting slopes, corresponding to the optical band gap estimate, of the first steep ascend in absorption (b) for  $\text{CaAlSiN}_3$  for the  $\text{CaGaSiN}_3$  analogous (Al/Si) ordering variants A, B and C.
